# Supplementary material
Source: PubMed Central journal article supplement (PMC7190292)
Supplement: mmc1.pdf [file mmc1.pdf]

# THE LANCET

## Child & Adolescent Health

### Supplementary appendix

This appendix formed part of the original submission and has been peer reviewed.  
We post it as supplied by the authors.

Supplement to: Guan H, Okely AD, Aguilar-Farias N, et al. Promoting healthy movement behaviours among children during the COVID-19 pandemic. *Lancet Child Adolesc Health* 2020; published online April 29. [https://doi.org/10.1016/S2352-4642\(20\)30131-0](https://doi.org/10.1016/S2352-4642(20)30131-0).

## Appendix

unknown. The coronavirus could devastate poor countries. *The Economist*. 2020.

Villatoro S. Indicadores no monetarios de carencias en las encuestas de los países de América Latina: disponibilidad, comparabilidad y pertinencia. 2017.

Sanderson D. Coronavirus an 'existential threat' to Africa and her crowded slums. *The Conversation Australia*; 2020, April 10.

Shiba K, Kondo N. The Global Financial Crisis and Overweight among Children of Single Parents: A Nationwide 10-Year Birth Cohort Study in Japan. *International journal of environmental research and public health* 2019; **16**(6): 1001.

Soininen S, Eloranta A-M, Lindi V, et al. Determinants of serum 25-hydroxyvitamin D concentration in Finnish children: the Physical Activity and Nutrition in Children (PANIC) study. *British Journal of Nutrition* 2016; **115**(6): 1080-91.

Aubert S, Barnes JD, Abdeta C, et al. Global matrix 3.0 physical activity report card grades for children and youth: results and analysis from 49 countries. *Journal of physical activity and health* 2018; **15**(s2): S251-S73.

Van Cauwenberghe E, Jones R, T H, Crawford D, AD O. Patterns of physical activity and sedentary behaviour in preschool children. *International Journal of Behavioral Nutrition and Physical Activity* 2012; **9**(138).

El-Sadr WM, Justman J. Africa in the Path of Covid-19. *New England Journal of Medicine* 2020.
